# Supplementary material for: Plasticity in deep and superficial white matter: a DTI study in world class gymnasts
Source: Springer Nature journal article supplement (doi:10.1007/s00429-017-1594-9), 2017-12-18
Supplement: MOESM1 [file 15315302]

**Supplementary Materials**

| **Table S1** Locations of white matter tract segments showing significant group difference in diffusion measures (FA, MD, AD, and RD) between the world-class gymnasts (WCGs) and the non-athlete normal controls (NCs). | | | |
| --- | --- | --- | --- |
| Diffusion measures / WM tracts | Diffusion measures for the tract segment | | |
| Location of the WM segment | WCGs | NCs |
| **FA** |  |  |  |
| IFOF.L | Node 1-33, 37-42, 76-78, 99 | 0.47 (0.03) | 0.52 (0.03) |
| ILF.R | Node 3-9, 17-34, 70-94 | 0.35 (0.04) | 0.40 (0.05) |
| UF.R | Node 32-50 | 0.35 (0.05) | 0.39 (0.04) |
| AF.R | Node 42-48 | 0.41 (0.06) | 0.50 (0.05) |
| **MD** |  |  |  |
| CST.R | Node 78-93 | 0.72 (0.02) | 0.74 (0.02) |
| ILF.R | Node 15-21, 55-62, 66-95 | 0.82 (0.03) | 0.78 (0.03) |
| UF.R | Node 11-51, 70-86 | 0.82 (0.03) | 0.78 (0.02) |
| **RD** |  |  |  |
| IFOF.R | Node 19-30 | 0.59 (0.04) | 0.54 (0.03) |
| ILF.R | Node 4, 7-31, 66-96 | 0.66 (0.04) | 0.61 (0.04) |
| UF.L | Node 28-62 | 0.65 (0.03) | 0.59 (0.06) |
| UF.R | Node 12-54, 75-86 | 0.65 (0.03) | 0.60 (0.03) |
| **AD** |  |  |  |
| AF.R | Node 42-47 | 1.04 (0.06) | 1.15 (0.06) |
| Note: Mean and standard deviation (SD) of diffusion measures are reported unless otherwise specified. The specific segments are indicated using the node locations. Abbreviation: IFOF, inferior fronto-occipital fasciculus; ILF, inferior longitudinal fasciculus; UF, uncinate fasciculus; AF, arcuate fasciculus; CST, corticospinal tract; IFOF, inferior fronto-occipital fasciculus; UF, uncinate fasciculus; FA, fractional anisotropy; AD, axial diffusivity; RD, radial diffusivity; and MD, mean diffusivity; L (R), left (right) hemisphere. | | | |

**
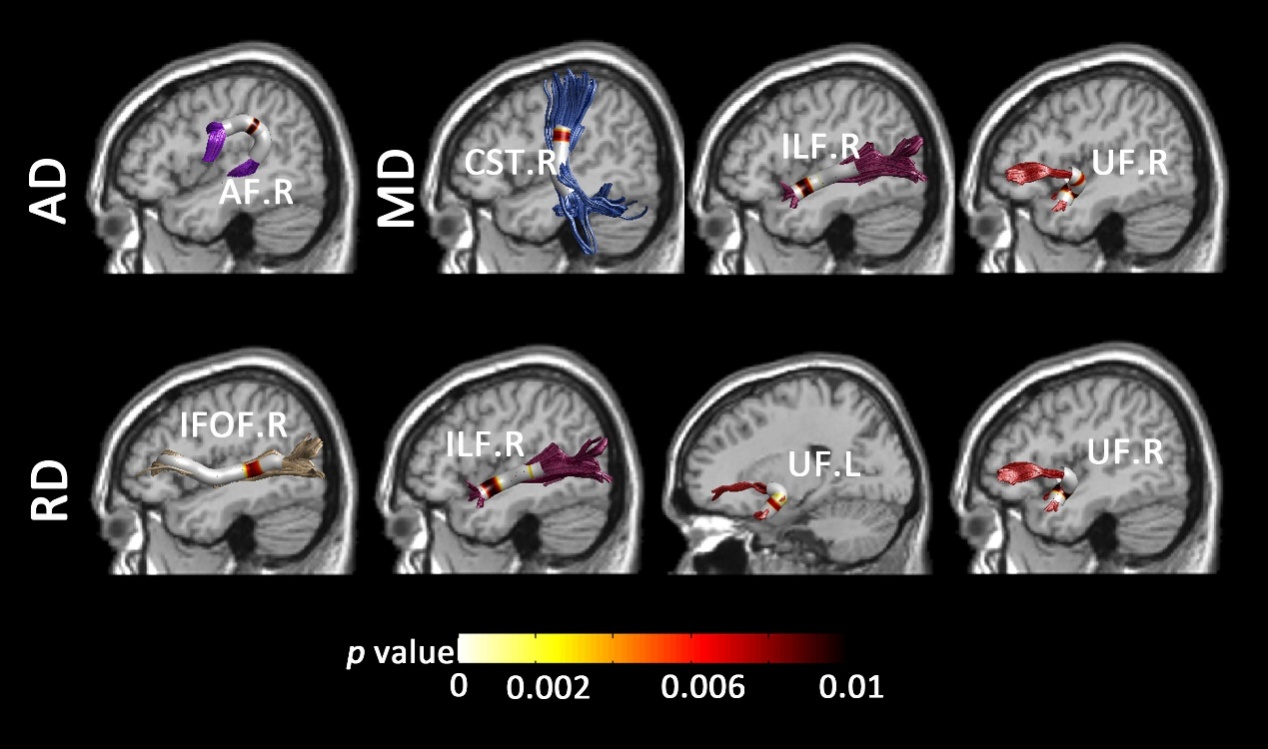
**

**Fig. S1** White matter profiles showing group differences in MD, AD and RD between the world class gymnastics (WCGs) and the non-athlete normal controls (NCs). Color bar indicates *p*-value of permutation tests conducted at each location along the tract length. Abbreviations: CST, corticospinal tract; ILF, inferior longitudinal fasciculus; UF, uncinate fasciculus; AF, arcuate fasciculus; IFOF, inferior fronto-occipital fasciculus; UF, uncinate fasciculus; AD, axial diffusivity; RD, radial diffusivity; and MD, mean diffusivity; L (R), left (right) hemisphere.
